# Supplementary material
Source: publisher site journal article supplement (https://www.dovepress.com/article/584595)
Supplement: Supplementary file 1 [file 584595%20Revised%20supplementary.docx]

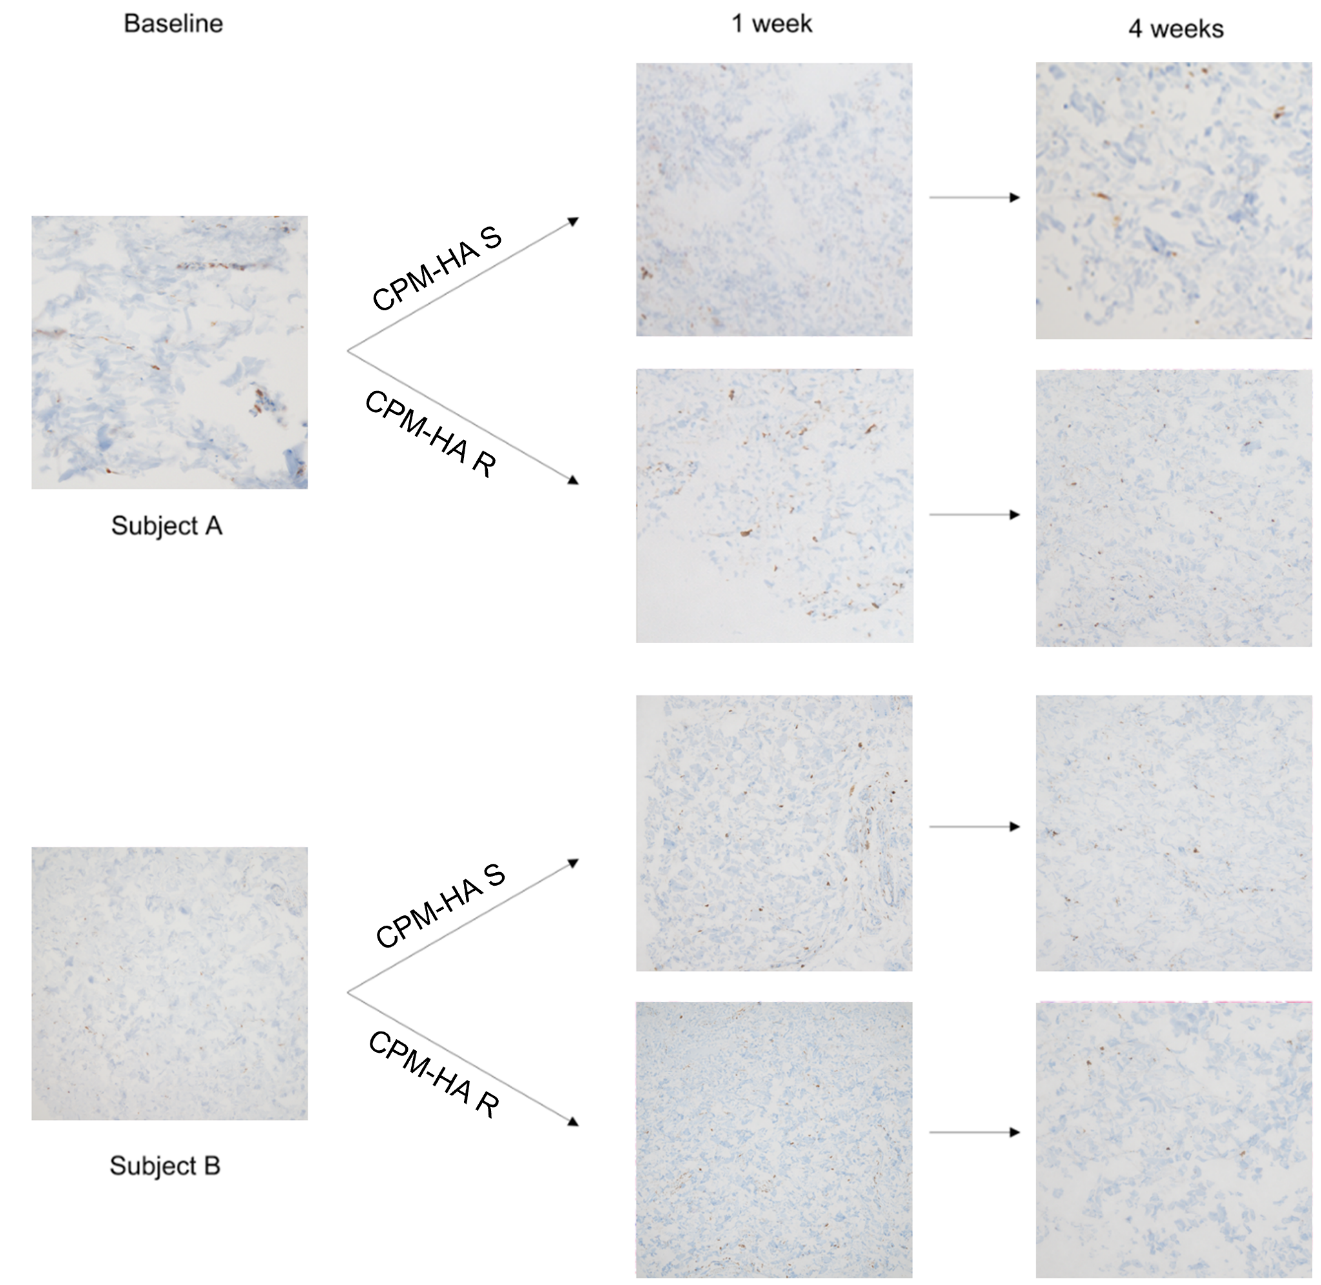
**Supplementary Figure 1** Immunohistochemical staining of CD68 in biopsy specimens using an anti-CD68 antibody (Abcam, Cat No. ab125157, Cambridge, United Kingdom) according to a standard protocol with 3,3′-diaminobenzidine used for chromogenic detection.
